# Supplementary material
Source: PubMed Central journal article supplement (PMC8296308)
Supplement: NIHMS1706872-supplement-Supple_fig_1.pdf [file NIHMS1706872-supplement-Supple_fig_1.pdf]

# Supplemental Figure 1.

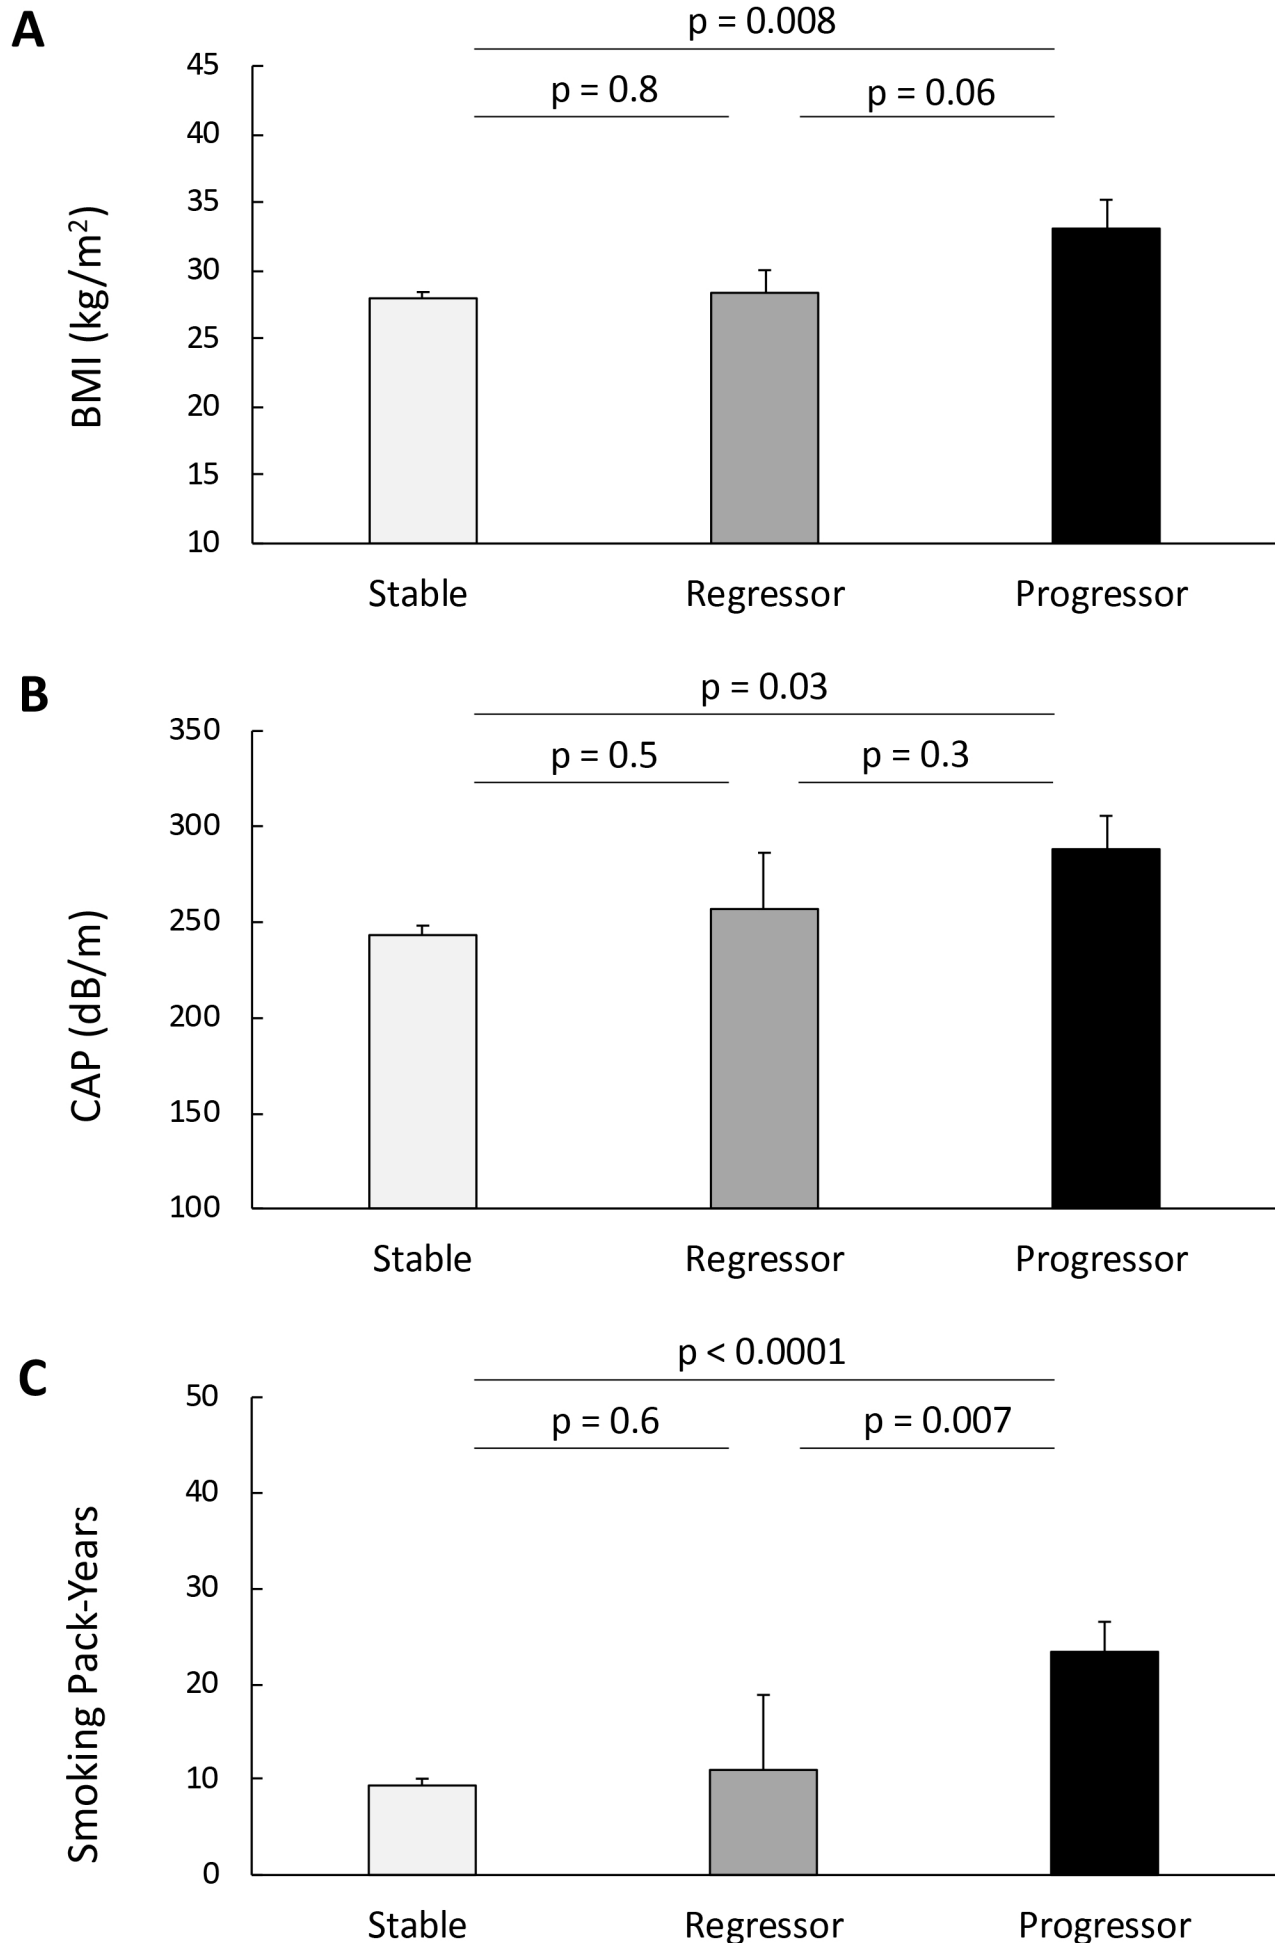

Participants categorized by change in fibrosis based on NAFLD established cut-offs for fibrosis stage at last follow-up as Stable (n=143), Regressor (n=10) and Progressor (n=9), comparing mean (A) Body Mass Index (BMI), (B) Controlled Attenuation Parameter (CAP) and (C) smoking pack-years between each group.
