# Supplementary material
Source: PubMed Central journal article supplement (PMC8296308)
Supplement: NIHMS1706872-supplement-Supple_table_1.pdf [file NIHMS1706872-supplement-Supple_table_1.pdf]

**Supplemental Table 1. Nominal Logistic Regression of Fibrosis Stage at Last Follow-up**

| <b>Parameter</b>         | <b>Chi Square Likelihood Ratio</b> | <b>P-value</b> |
|--------------------------|------------------------------------|----------------|
| Age, y                   | 1.77                               | 0.62           |
| Baseline Metavir, F1-F4  | 83.22                              | <0.0001        |
| BMI (kg/m <sup>2</sup> ) | 5.14                               | 0.16           |
| CAP score, dB/m          | 8.00                               | 0.046          |
| Alcohol, drinks per week | 1.60                               | 0.66           |
| HIV co-infection, Y vs N | 11.67                              | 0.009          |
| Smoking pack-years       | 17.01                              | 0.0007         |
| Years follow-up          | 6.98                               | 0.07           |
